# Supplementary material
Source: publisher figshare collection journal article supplement (https://acs.figshare.com/ndownloader/files/4120315)
Supplement: Supplementary file 1 [file 4120315]

### Supplemental Information S3

We define  $M$  as the number of occupied bins,  $B$  as the number of bins, and  $N$  as the number of components. The length of a single bin is  $0 < L \leq 1$  noting that the total number of bins  $B = L^{-2}$ . Using normalized retention time pairs  $t_1, t_2$ , which are mapped onto a unit area, as described in the text as eq 1, each retention time pair is used to occupy bins one of the  $B$  bins. The starting point of this treatment is to define the probability of the number of occupied and non-occupied bins. As defined in the text, the surface coverage metric  $SC_G$  is defined as  $M / B$ .

Let  $\xi_i$  be a bivariate random variable with probability density function (pdf) of  $f(x,y)$  where  $x$  and  $y$  are the two normalized (between 0 and 1) retention time ranges and  $1 \leq i \leq N$ . Each bin has a random variable  $\chi_j$  which is either 0 (empty) or 1 (occupied by one or more components) where the index  $j$  has limits of  $1 \leq j \leq B$ . Each bin is identified as  $\beta_j$ .

The probability that the  $j$ th bin is empty is:

$$\Pr(\chi_j = 0) = \left( 1 - \int_{\beta_j} f(x, y) dx dy \right)^N \quad (\text{s3.1})$$

where the integration is over a small square patch defined by the spatial limits of  $\beta_j$ . The expected number of non-empty bins is thus

$$E[\chi_1 + \dots + \chi_B] = E[\chi_1] + \dots + E[\chi_B] = \sum_{j=1}^B \left( 1 - \left( 1 - \int_{\beta_j} f(x, y) dx dy \right)^N \right) \quad (\text{s3.2})$$

where  $E[]$  denotes the average or expectation operator. For small bins (small  $L$ ) the integrals above can be approximated as

$$\int_{\beta_j} f(x, y) dx dy \approx f_j L^2 \quad (\text{s3.3})$$

where  $f_j$  is the value of the pdf evaluated at the center or any location within the bin. This simplifies the expression for the expected number of non-empty bins to

$$\sum_{j=1}^B \left( 1 - \left( 1 - f_j L^2 \right)^N \right) \quad (\text{s3.4})$$

The ratio between the number of non-empty bins and the number of all bins is thus

$$\frac{\sum_{j=1}^B \left(1 - (1 - f_j L^2)^N\right)}{B} = \frac{\sum_{j=1}^{L^2} \left(1 - (1 - f_j L^2)^N\right)}{L^2} \quad (\text{s3.5})$$

In the special case when the number of components  $N$  is equal to the number of bins so that  $N=B=L^{-2}$  and noting that  $\lim_{N \rightarrow \infty} (1-1/N)^N = 1/e$

$$\begin{aligned} SC(N) &= \frac{1}{N} \sum_{j=1}^N \left(1 - \left(1 - \frac{f_j}{N}\right)^N\right) \approx \frac{1}{N} \sum_{j=1}^N (1 - e^{-f_j}) \\ &\approx 1 - \frac{1}{N} \sum_{j=1}^N (e^{-f_j}) \approx 1 - \int_{\beta} e^{-f(x,y)} dx dy \end{aligned} \quad (\text{s3.6})$$

where the integral is over all bins. In the case where the pdf is uniformly distributed across all of the bin space,  $f(x,y) = f_j = 1$  and

$$SC(N, L) = \frac{L^{-2} \left(1 - (1 - L^2)^N\right)}{L^{-2}} = 1 - (1 - L^2)^N \quad (\text{s3.7})$$

Equation s3.7 can be arranged into a form equivalent to eq 3 in the manuscript using the expressions  $L^2=1/B$  and  $SC=M/B$ . It can also be converted into a logarithmic form s3.8 used to generate Figure 7 in the manuscript such that:

$$\log SC(N, L) = \log \left(1 - \left(1 - \frac{1}{B}\right)^B\right) \quad (\text{s3.8})$$

Mutual information calculation was carried out using following equations.

$$\text{Total number of bins: } B = P \times Q \quad (\text{s3.9})$$

Indexing of bins:  $p=1\dots P, q=1\dots Q$

Total number of components:  $N = \sum_{p=1}^P \sum_{q=1}^Q n_{pq}$  (s3.10)

Column-wise (for q-th column) summation of components:  $n_{+q} = \sum_{p=1}^P n_{pq}$  (s3.11a)

Row-wise (for p-th row) summation of components:  $n_{p+} = \sum_{q=1}^Q n_{pq}$  (s3.11b)

Consequently:  $\sum_{p=1}^P n_{p+} = \sum_{q=1}^Q n_{+q} = N$  (s3.12)

Mutual information is then calculated according equation s3.12:

$$MI = \log(N) + \frac{1}{N} \times \sum_{p=1}^P \sum_{q=1}^Q n_{pq} \log \left( \frac{n_{pq}}{n_{p+} n_{+q}} \right) \quad (\text{s3.13})$$

A solved example of MI calculation is included in Excel sheet Supplemental SC(G) calculator S1 (worksheet "MI calc example").

Further simplification of relationship shown as equation 9 in the manuscript text:

Because  $L=B^{-1/2}$  and for  $B=N$  the equation 9 can be rearranged as

$$\log SC = \log A + \left( \frac{D}{2} - 1 \right) \log N \quad \text{s3.14}$$

which for  $B=N=196$  further simplifies as

$$\log SC_G = \log A + \left( \frac{D}{2} - 1 \right) \log 196 \quad \text{s3.15}$$

or

$$SC_G = A \times 196^{\left( \frac{D}{2} - 1 \right)} \quad \text{s3.16}$$

The value of A needs to be obtained in the linear region of  $\log L$  in equation 9. Beyond the linear region the equation 9 is not valid. See e.g. the plots in Figure 6D.
